# Supplementary material for: Encapsulation of bryostatin-1 by targeted exosomes enhances remyelination and neuroprotection effects in the cuprizone-induced demyelinating animal model of multiple sclerosis
Source: Royal Society of Chemistry journal article supplement (doi:10.1039/d1bm01142a), 2021-12-02
Supplement: d1bm01142a1.pdf [file d1bm01142a1.pdf]

**Supplementary Table 1**

| Gene | Primers for PCR              |                              |
|------|------------------------------|------------------------------|
|      | Forward(5'-3')               | Reverse(5'-3')               |
| PDGF | ACTTCTAGAATGAGGACCTGGGCTTGCC | CTTGAATTCTCACCTCACATCTGTCTCC |
| A    | T                            | T                            |
